# Supplementary material for: Dimeric packing of molecular clips induced by interactions between π-systems
Source: Royal Society of Chemistry journal article supplement (doi:10.1039/c4ce02447h), 2015-01-01

## Supporting Information

### Dimeric Packing of Molecular Clips Induced by Interactions Between $\pi$ -Systems

*Jungang Wang,<sup>†</sup> Miao Wang,<sup>†</sup> Jiachen Xiang,<sup>†</sup> Liping Cao,<sup>‡</sup> Anxin Wu<sup>\*,†</sup> and Lyle Isaacs<sup>\*,‡</sup>*

<sup>†</sup>Key Laboratory of Pesticide & Chemical Biology, Ministry of Education, College of Chemistry,  
Central China Normal University, Hubei, Wuhan 430079, P. R. China

<sup>‡</sup>Department of Chemistry and Biochemistry, University of Maryland, College Park, Maryland  
20742

<sup>†</sup>chwuax@mail.ccnu.edu.cn; <sup>‡</sup>lisaacs@umd.edu

| <b>Table of contents</b>                                                  | <b>Page</b> |
|---------------------------------------------------------------------------|-------------|
| General Experimental .....                                                | S2          |
| Synthesis and characterization of compounds <b>1-7</b> .....              | S2-S9       |
| CSD search.....                                                           | S9          |
| Details of the refinements and geometrical parameters of <b>1-7</b> ..... | S10-S13     |
| <sup>1</sup> H and <sup>13</sup> C NMR Spectra for <b>1 – 7</b> .....     | S14-S26     |

**General Experimental.** The reagents and solvents employed were commercially available and used as received without further purification. Dichloromethane was distilled from  $\text{CaH}_2$  immediately before use.  $\text{NEt}_3$  was distilled from  $\text{KOH}$  immediately before use. Compound **8** and **9** were prepared according to the reported methods.<sup>1,2</sup> IR spectra were recorded on a Perkin-Elmer PE-983 infrared spectrometer as KBr pellets with absorption in  $4000\text{--}400\text{ cm}^{-1}$ . NMR spectra were recorded on a Varian Mercury 400 or 600 MHz spectrometer and resonances ( $\delta$ ) are given in parts per million relative to tetramethylsilane (TMS) as internal standard. High resolution mass spectra were obtained on a Bruker Apex-Ultra 7.0T FTMS equipped with an electrospray ionization source (ESI). Melting points were determined using an XT-4 apparatus and were not corrected.

### Synthesis and characterization of compounds 1 – 7

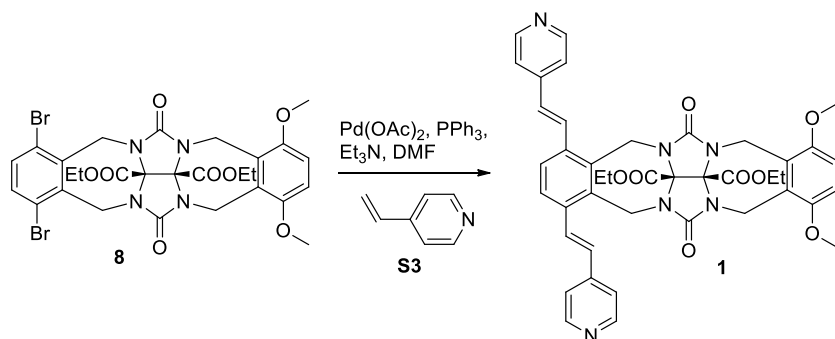

**Scheme S1.** Synthesis of Compounds **1** by Heck coupling.

**Experimental procedure for compound 1.** To a solution of  $\text{Pd}(\text{OAc})_2$  (2.3 mg, 0.01 mmol),  $\text{PPh}_3$  (6.0 mg, 0.02 mmol) and **8**<sup>1</sup> (142 mg, 0.2 mmol) in freshly distilled  $\text{Et}_3\text{N}$  (5 mL) and  $\text{DMF}$  (5 mL) under Ar atmosphere at room temperature was added 4-vinylpyridine (63 mg, 0.6 mmol). The mixture was warmed to  $110\text{ }^\circ\text{C}$  for 12 h (monitored by TLC), and then the solvent was removed under reduced pressure. The solid residue was purified by flash chromatography ( $\text{SiO}_2$ ,  $\text{CH}_2\text{Cl}_2/\text{CH}_3\text{OH}$ , 50:1) to give crude **1** (113 mg, 0.15 mmol, 75%) as a yellow solid. To further purify the crude product, about 2 mL ethyl acetate was added and the solution was vibrated by

ultrasonic oscillator. Finally, the solvent and the desired solid compound **1** were separated by centrifugation (98 mg, 0.13 mmol, 65%). M.p. > 300 °C. TLC (CHCl<sub>3</sub>/MeOH 50:1) R<sub>f</sub> 0.14. IR (KBr, cm<sup>-1</sup>): 3420m, 2964w, 1758s, 1717s, 1596s, 1467s, 1433s, 1360w, 1307m, 1258s, 1019m, 943w. <sup>1</sup>H NMR (600 MHz, CDCl<sub>3</sub>): δ = 8.40 (d, J = 4.8 Hz, 4H), 7.89 (d, J = 16.2 Hz, 2H), 7.33 (d, J = 5.4 Hz, 4H), 6.80 (d, J = 16.2 Hz, 2H), 6.42 (brs, 2H), 6.32 (s, 2H), 5.65 (d, J = 16.2 Hz, 2H), 5.21 (d, J = 16.2 Hz, 2H), 4.31 (q, J = 7.2 Hz, 2H), 4.28-4.24 (m, 4H), 4.18 (d, J = 16.8 Hz, 2H), 3.50 (s, 6H), 1.35 (t, J = 7.2 Hz, 3H), 1.34 (t, J = 7.2 Hz, 3H). <sup>13</sup>C NMR (150 MHz, CDCl<sub>3</sub>): δ = 166.1, 165.8, 156.4, 150.6, 149.8, 144.8, 135.6, 134.5, 129.9, 129.4, 126.6, 125.7, 120.9, 111.1, 80.7, 79.3, 63.4, 63.2, 55.9, 40.0, 37.1, 14.0, 14.0. HRMS (ESI): *m/z* [M + H]<sup>+</sup> calcd for C<sub>42</sub>H<sub>41</sub>N<sub>6</sub>O<sub>8</sub>: 757.2980; found: 757.2967.

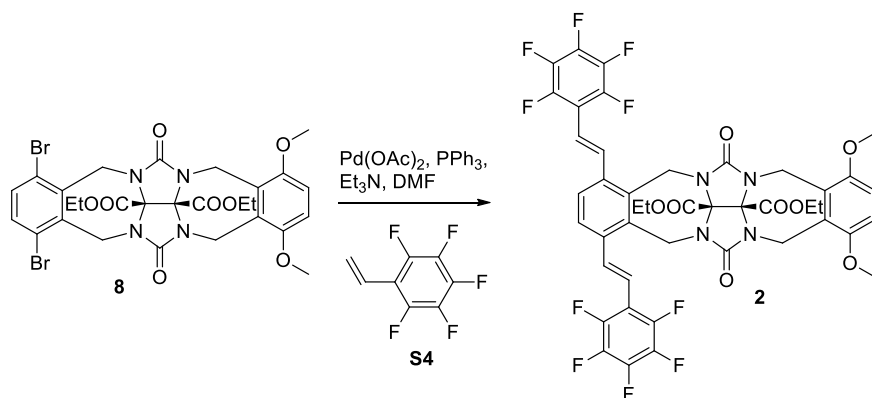

**Scheme S2.** Synthesis of Compounds **2** by Heck coupling.

**Experimental procedure for compound 2.** To a solution of Pd(OAc)<sub>2</sub> (2.3 mg, 0.01 mmol), PPh<sub>3</sub> (6.0 mg, 0.02 mmol) and **8** (142 mg, 0.2 mmol) in freshly distilled Et<sub>3</sub>N (5 mL) and DMF (5 mL) under Ar atmosphere at room temperature was added 1,2,3,4,5-pentafluoro-6-vinylbenzene (116.4 mg, 0.6 mmol). The mixture was warmed to 110 °C for 12 h (monitored by TLC), and then the solvent was removed under reduced pressure. The solid residue was purified by flash chromatography (SiO<sub>2</sub>, CH<sub>2</sub>Cl<sub>2</sub>/CH<sub>3</sub>OH, 50:1) to give **2** (134 mg, 0.143 mmol, 72%) as a yellow solid. To further purify the crude product, about 2 mL ethyl acetate was added and the solution was vibrated by ultrasonic oscillator. Finally, the solvent and the desired solid compound **2** was separated by centrifugation (114 mg, 0.122 mmol, 61%). M.p. >

300 °C. TLC (CHCl<sub>3</sub>/MeOH 50:1) R<sub>f</sub> 0.17. IR (KBr, cm<sup>-1</sup>): 3442w, 2986w, 2360w, 1724s, 1463s, 1259s, 1081m, 917w. <sup>1</sup>H NMR (600 MHz, CDCl<sub>3</sub>): δ = 8.27 (d, J = 16.8 Hz, 2H), 7.45 (s, 2H), 6.77 (d, J = 16.2 Hz, 2H), 6.66 (s, 2H), 5.17 (d, J = 16.8 Hz, 2H), 4.98 (d, J = 15.0 Hz, 2H), 4.45 (d, J = 15.0 Hz, 2H), 4.28-4.23 (m, 4H), 4.04 (q, J = 7.2 Hz, 2H), 3.69 (s, 6H), 1.31 (t, J = 7.2 Hz, 3H), 1.20 (t, J = 7.2 Hz, 3H). <sup>13</sup>C NMR (150 MHz, CDCl<sub>3</sub>): δ = 166.1, 165.8, 156.6, 150.9, 137.6, 135.7, 127.0, 125.8, 116.5, 111.9, 80.6, 79.6, 63.4, 63.0, 56.5, 40.5, 37.5, 14.0, 13.9. HRMS (APCI): *m/z* [M + H]<sup>+</sup> calcd for C<sub>44</sub>H<sub>33</sub>F<sub>10</sub>N<sub>4</sub>O<sub>8</sub>: 935.2138; found: 935.2133.

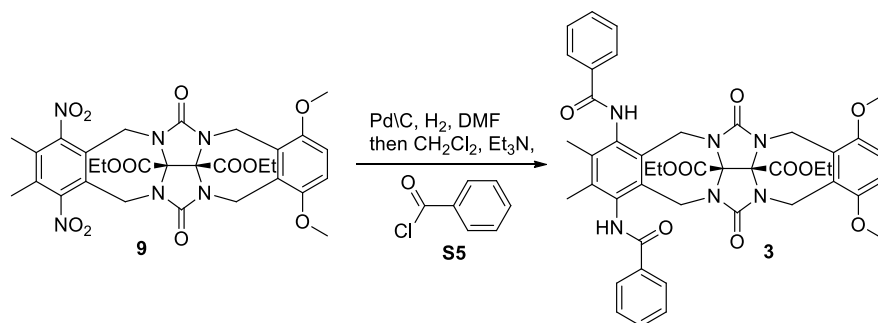

**Scheme S3.** Synthesis of **3** via Pd/H<sub>2</sub> reduction and amide bond formation.

**Experimental procedure for compound 3.** A mixture of **9**<sup>2</sup> (66.8 mg, 0.10 mmol) and 10% Pd/C (20 mg,) in anh. DMF (5 mL) was stirred under H<sub>2</sub> (10-20 psi) at RT for 5 h. The reaction mixture was filtered under Ar, and concentrated under high vacuum at RT. The residue was dissolved in a mixture of anh. degassed CH<sub>2</sub>Cl<sub>2</sub> (10 mL) and Et<sub>3</sub>N (0.05 mL, 0.30 mmol). This solution was added to a solution of benzoyl chloride (14 μL, 0.11 mmol) in anh. degassed CH<sub>2</sub>Cl<sub>2</sub> (10 mL) at -78 °C. After 15 min., the cooling bath was removed and stirring was continued at RT for 12 h. The reaction mixture was diluted with CHCl<sub>3</sub> (200 mL), washed with sat. aq. NaHCO<sub>3</sub> dried over anh. MgSO<sub>4</sub> and concentrated. Flash chromatography (SiO<sub>2</sub>, CHCl<sub>3</sub>/MeOH, 50:1) gave slightly impure **3** (70 mg, 0.085 mmol, 85%). To get highest purity material, the white solid was washed with EtOAc (1.0 mL), centrifuged, the supernatant decanted, and the residual solid dried under high vacuum yielding **3** (60 mg, 0.073 mmol, 73%). M.p. > 300 °C. TLC (CHCl<sub>3</sub>/MeOH 50:1) R<sub>f</sub> 0.34. IR (KBr, cm<sup>-1</sup>): 3395m, 3322m, 2999w, 2964w, 2941w, 1759s, 1699s, 1682s, 1600w, 1580w, 1509m, 1470s, 1433s, 1356m, 1254s,

1154m, 1131m, 1079m, 1031w, 1012w, 942w.  $^1\text{H}$  NMR (600 MHz,  $\text{CDCl}_3$ ):  $\delta$  = 8.98 (s, 2H), 8.13 (d,  $J$  = 6.6 Hz, 4H), 7.58 (m, 2H), 7.53 (t,  $J$  = 7.2 Hz, 4H), 6.68 (s, 2H), 5.03 (d,  $J$  = 16.2 Hz, 2H), 4.88 (d,  $J$  = 15.0 Hz, 2H), 4.52 (d,  $J$  = 15.6 Hz, 2H), 4.31 (d,  $J$  = 16.2 Hz, 2H), 4.25 (q,  $J$  = 7.2 Hz, 2H), 3.99 (q,  $J$  = 6.6 Hz, 2H), 3.77 (s, 6H), 2.18 (s, 6H), 1.28 (t,  $J$  = 7.2 Hz, 3H), 1.17 (t,  $J$  = 7.2 Hz, 3H).  $^{13}\text{C}$  NMR (150 MHz,  $\text{CDCl}_3$ ):  $\delta$  = 165.8, 165.7, 165.5, 157.7, 151.1, 136.6, 133.7, 133.2, 131.9, 131.0, 128.7, 127.5, 125.4, 111.9, 95.3, 80.0, 63.7, 63.1, 56.6, 40.7, 37.7, 16.1, 13.8, 13.7. HRMS (ESI):  $m/z$   $[\text{M} + \text{H}]^+$  calcd for  $\text{C}_{44}\text{H}_{45}\text{N}_6\text{O}_{10}$ : 817.3192, found: 817.3197.

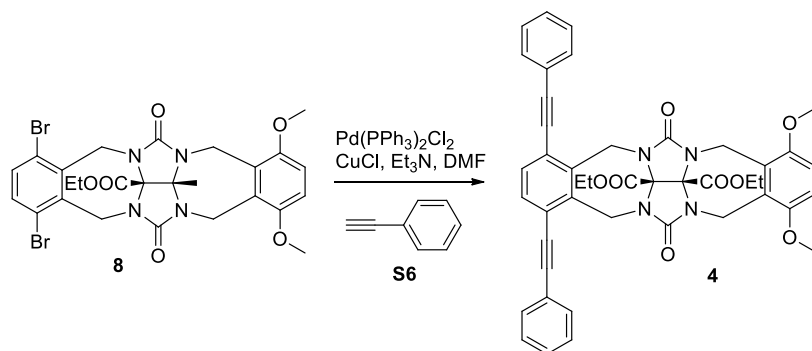

**Scheme S4.** Synthesis of **4** by Sonogashira coupling.

**Experimental procedure for compound 4.** To a solution of  $\text{Pd}(\text{PPh}_3)_2\text{Cl}_2$  (36 mg, 0.05 mmol),  $\text{CuI}$  (19 mg, 0.10 mmol) and **8** (354 mg, 0.50 mmol) in freshly distilled  $\text{Et}_3\text{N}$  (2 mL) and DMF (10 mL) under Ar atmosphere at room temperature was added ethynylbenzene (204 mg, 2.0 mmol). The mixture was warmed to 110 °C for 12 h (monitored by TLC) and then the solvent was removed under reduced pressure. The solid residue was purified by flash chromatography ( $\text{SiO}_2$ ,  $\text{CH}_2\text{Cl}_2/\text{CH}_3\text{OH}$ , 50:1) to give **4** (251 mg, 0.335 mmol, 67%) as a white solid. In order to purify the crude product, about 2 mL ethyl acetate was added and the solution was vibrated by ultrasonic oscillator. Finally, the solvent and the desired solid compound **4** were separated by centrifugation (210 mg, 0.28 mmol, 56%). M.p. = 290-291 °C, TLC ( $\text{CHCl}_3/\text{MeOH}$ , 50:1)  $R_f$  0.15. IR (KBr,  $\text{cm}^{-1}$ ): 3438w, 2924w, 1725s, 1460s, 1427m, 1258s, 1081m, 757w.  $^1\text{H}$  NMR (600 MHz,  $\text{CDCl}_3$ )  $\delta$  7.64 – 7.62 (m, 4H), 7.42 (s, 2H), 7.37 – 7.36 (m, 6H), 6.69 (s, 2H), 5.58 (d,  $J$  = 15.6 Hz, 2H), 5.06 (d,  $J$  = 15.6 Hz, 2H), 4.50 (d,  $J$  = 15.6 Hz, 2H), 4.42 (d,  $J$  = 15.6 Hz, 2H), 4.18 (q,  $J$  = 7.2 Hz, 2H), 4.04 (q,  $J$  = 6.6 Hz, 2H), 3.77 (s, 6H), 1.29 (t,  $J$  = 7.2 Hz, 3H), 1.20 (t,  $J$

= 7.2 Hz, 3H).  $^{13}\text{C}$  NMR (150 MHz,  $\text{CDCl}_3$ )  $\delta$  166.2, 166.1, 156.4, 151.1, 138.2, 131.9, 131.7, 128.5, 128.24, 125.9, 123.7, 122.9, 112.2, 95.7, 87.1, 80.1, 63.4, 63.0, 56.8, 56.7. HRMS (ESI):  $m/z$   $[\text{M}+\text{H}]^+$  calcd for  $\text{C}_{44}\text{H}_{39}\text{N}_4\text{O}_8$ : 751.2748; found: 751.2762.

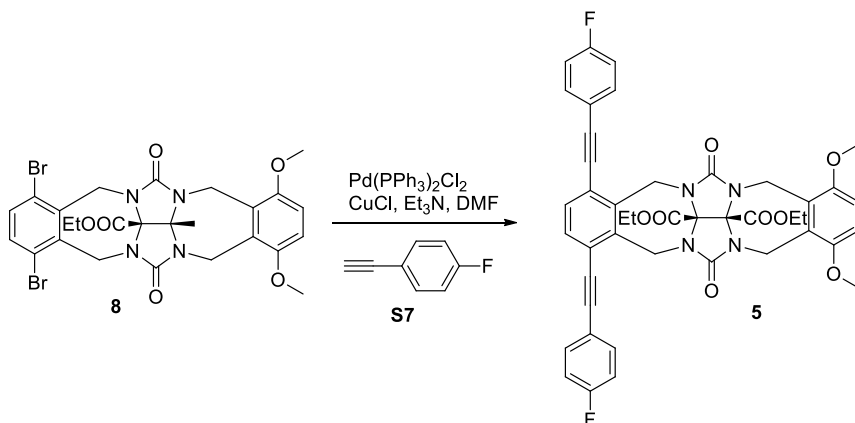

**Scheme S5.** Synthesis of compound **5** by Sonogashira coupling.

**Experimental procedure for compound 5.** To a solution of  $\text{Pd}(\text{PPh}_3)_2\text{Cl}_2$  (36 mg, 0.05 mmol),  $\text{CuI}$  (19 mg, 0.10 mmol) and **8** (354 mg, 0.50 mmol) in freshly distilled  $\text{Et}_3\text{N}$  (2 mL) and DMF (10 mL) under Ar atmosphere at room temperature was added 1-ethynyl-4-fluorobenzene (240 mg, 2.0 mmol). The mixture was warmed to 110 °C for 12 h (monitored by TLC) and then the solvent was removed under reduced pressure. The solid residue was purified by flash chromatography ( $\text{SiO}_2$ ,  $\text{CH}_2\text{Cl}_2/\text{CH}_3\text{OH}$ , 50:1) to give **4** (298 mg, 0.38 mmol, 76%) as a white solid. In order to purify the crude product, about 2 mL ethyl acetate was added and the solution was vibrated by ultrasonic oscillator. Finally, the solvent and the desired solid compound **4** were separated by centrifugation (255 mg, 0.325 mmol, 65%). M.p. = 296-297 °C TLC ( $\text{CHCl}_3/\text{MeOH}$ , 50:1)  $R_f$  0.12. IR (KBr,  $\text{cm}^{-1}$ ): 3441w, 2986w, 1727s, 1510s, 1460s, 1427m, 1258s, 839m.  $^1\text{H}$  NMR (600 MHz, DMSO)  $\delta$  7.71-7.69 (m, 4H), 7.44 (s, 2H), 7.33 (t,  $J$  = 9.0 Hz, 4H), 6.83 (s, 2H), 5.44 (d,  $J$  = 16.2 Hz, 2H), 5.16 (d,  $J$  = 16.2 Hz, 2H), 4.55 (d,  $J$  = 16.2 Hz, 2H), 4.28 (q,  $J$  = 7.2 Hz, 2H), 4.21 – 4.15 (m, 4H), 3.69 (s, 6H), 1.28 (t,  $J$  = 7.2 Hz, 3H), 1.22 (t,  $J$  = 7.2 Hz, 3H).  $^{13}\text{C}$  NMR (100 MHz,  $\text{CDCl}_3$ )  $\delta$  166.2, 166.1, 164.0, 161.6, 156.4, 151.2, 138.5,

133.8, 133.7, 131.5, 126.1, 123.7, 119.1, 115.8, 115.6, 112.2, 94.7, 86.9, 63.4, 63.0, 56.8, 42.9, 37.6, 14.0, 13.9. HRMS (APCI):  $m/z$   $[M+H]^+$  calcd for  $C_{44}H_{37}F_2N_4O_8$ : 787.2572; found: 787.2574.

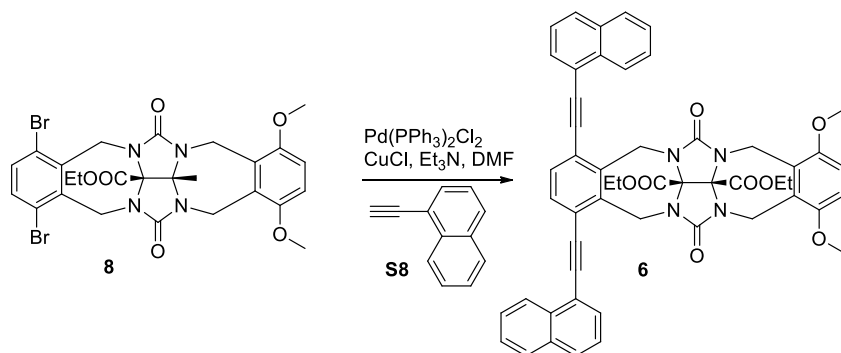

**Scheme S6.** Synthesis of compound **6** by Sonogashira coupling.

**Experimental procedure for compound 6.** To a solution of  $Pd(PPh_3)_2Cl_2$  (36 mg, 0.05 mmol), CuI (19 mg, 0.10 mmol) and **8** (354 mg, 0.50 mmol) in freshly distilled  $Et_3N$  (2 mL) and DMF (10 mL) under Ar atmosphere at room temperature was added 1-ethynylnaphthalene (304 mg, 2.0 mmol). The mixture was warmed to 110 °C for 12 h (monitored by TLC) and then the solvent was removed under reduced pressure. The solid residue was purified by flash chromatography ( $SiO_2$ ,  $CH_2Cl_2/CH_3OH$ , 50:1) to give **4** (314 mg, 0.37 mmol, 74%) as a white solid. In order to purify the crude product, about 2 mL ethyl acetate was added and the solution was vibrated by ultrasonic oscillator. Finally, the solvent and the desired solid compound **4** were separated by centrifugation (280 mg, 0.33 mmol, 66%). M.p. > 300 °C, TLC ( $CHCl_3/MeOH$ , 50:1)  $R_f$  0.13. IR (KBr,  $cm^{-1}$ ): 3431w, 2920w, 1758s, 1722s, 1462s, 1425m, 1258s, 1080m, 801m, 774w.  $^1H$  NMR (600 MHz, DMSO)  $\delta$  8.54 (d,  $J$  = 8.4 Hz, 2H), 8.07 (t,  $J$  = 9.0 Hz, 4H), 7.94 (d,  $J$  = 7.8 Hz, 2H), 7.72 (t,  $J$  = 7.8 Hz, 2H), 7.68 – 7.65 (m, 3H), 7.62 (t,  $J$  = 7.2 Hz, 2H), 6.81 (s, 2H), 5.61 (d,  $J$  = 16.2 Hz, 2H), 5.21 (d,  $J$  = 16.2 Hz, 2H), 4.70 (d,  $J$  = 16.2 Hz, 2H), 4.30 (q,  $J$  = 6.6 Hz, 2H), 4.22 (q,  $J$  = 6.6, 7.3 Hz, 2H), 4.18 (d,  $J$  = 16.2 Hz, 2H), 3.68 (s, 6H), 1.29 (t,  $J$  = 7.2 Hz, 3H), 1.24 (t,  $J$  = 7.1 Hz, 3H).  $^{13}C$  NMR could not be obtained even with 12 h acquisition time because of

the low solubility of compound **6**. HRMS (APCI):  $m/z$   $[M+H]^+$  calcd for  $C_{52}H_{43}N_4O_8$ : 851.3082; found: 851.3075.

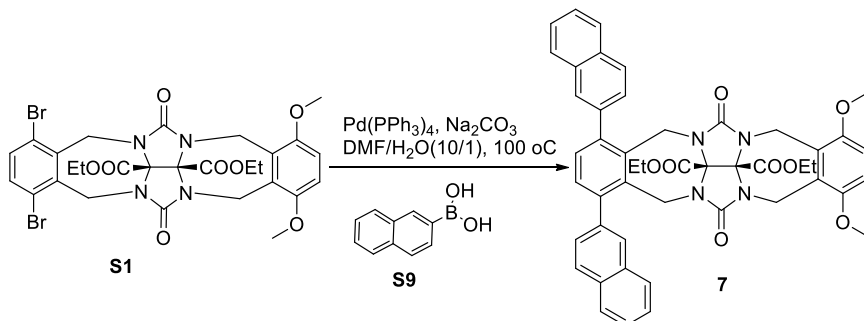

**Scheme S7.** Synthesis of compound **7** by Suzuki coupling.

**Experimental procedure for compound 7.** To a solution of  $Pd(PPh_3)_4$  (35 mg, 0.03 mmol),  $Na_2CO_3$  (106 mg, 1 mmol) and **S1** (142 mg, 0.20 mmol) in DMF (10 mL) and  $H_2O$  (1 mL) under Ar atmosphere at room temperature was added naphthalen-2-ylboronic acid (103 mg, 0.60 mmol). The mixture was warmed to 100 °C for 2 h (monitored by TLC) and then the solvent was removed under reduced pressure. The solid residue was purified by flash chromatography ( $SiO_2$ , Petroleum ether b.p. 60-90 °C/EtOAc, 40:1) to give **7** (144 mg, 0.18 mmol, 90%) as a white solid. M.p. = 197-198 °C. TLC (Petroleum ether b.p. 60-90 °C/EtOAc 40:1)  $R_f$  0.14. IR (KBr,  $cm^{-1}$ ): 3446m, 2987w, 1722s, 1463s, 1430m, 1238s, 1082m, 821w, 481w.  $^1H$  NMR (600 MHz,  $CDCl_3$ )  $\delta$  7.95 (d,  $J$  = 8.4 Hz, 2H), 7.91 – 7.89 (m, 6H), 7.69 (s, 2H), 7.53 – 7.52 (m, 4H), 7.44 (s, 2H), 6.80 (s, 2H), 5.39 (d,  $J$  = 15.6 Hz, 2H), 4.79 (d,  $J$  = 14.4 Hz, 2H), 4.48 (d,  $J$  = 12.0 Hz, 2H), 4.18 – 4.12 (m, 4H), 3.89 (q,  $J$  = 7.2 Hz, 3H), 3.82 (s, 6H), 1.28 (t,  $J$  = 6.6 Hz, 2H), 1.04 (t,  $J$  = 6.6 Hz, 3H).  $^{13}C$  NMR (100 MHz,  $CDCl_3$ )  $\delta$  186.4, 166.0, 157.1, 151.3, 142.2, 137.6, 133.1, 132.5, 132.4, 130.5, 128.2, 128.1, 128.0, 127.6, 127.2, 126.6, 126.2, 126.1, 112.7, 81.6, 79.3, 63.3, 63.1, 57.1, 43.6, 37.3, 13.9, 13.8. HRMS (APCI):  $m/z$   $[M + H]^+$  calcd for  $C_{48}H_{43}N_4O_8$ : 803.3077; found: 803.3075.

**CSD search** [CSD version 5.35 updates (May 2014)]

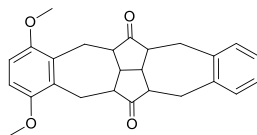

| Total | monomer | dimer |         |
|-------|---------|-------|---------|
|       |         | in-in | out-out |
| 36    | 13      | 22    | 0       |

Details :

| CSD refcodes            | packing | motif | CSD refcodes | packing | motif |
|-------------------------|---------|-------|--------------|---------|-------|
| AKAGUO                  | dimer   | in-in | UFONUZ       | dimer   | in-in |
| AKAHAV                  | dimer   | in-in | CIDSIS       | monomer |       |
| HAHDOJ                  | monomer |       | CIDSOY       | dimer   | in-in |
| HEBYAP                  | monomer |       | CIDSUE       | dimer   | in-in |
| JISDEU                  | monomer |       | CIDTAL       | dimer   | in-in |
| JISDEU10                | monomer |       | CIDTEP       | dimer   | in-in |
| LANWAY <sup>a</sup>     |         |       | CIDTIT       | dimer   | in-in |
| MUTFAI                  | dimer   | in-in | HIRSIL       | dimer   | in-in |
| QIQDAV                  | dimer   | in-in | KEKREY       | dimer   | in-in |
| ROBWEK                  | dimer   | in-in | KEKSEZ       | dimer   | in-in |
| ROBWEK01 <sup>a,b</sup> | dimer   | in-in | KEKSID       | dimer   | in-in |
| SURDUE                  | monomer |       | KEKSOJ       | dimer   | in-in |
| VOKGUX                  | monomer |       | XEVCAD       | monomer |       |
| CURSIG                  | monomer |       | HEBYAP       | monomer |       |
| CURSOY                  | dimer   | in-in | AKAGUO       | dimer   | in-in |
| CURSUE                  | dimer   | in-in | AKAHAV       | dimer   | in-in |
| DIYYEQ                  | monomer |       | MUTFAI       | dimer   | in-in |
| OFOXEN                  | monomer |       | ROBWEK01     | monomer |       |

<sup>a</sup>No structure available in CSD searched result, <sup>b</sup>the packing structure was according to the reference (*Recl. Trav. Chim. Pays-Bas*, **1993**, 112, 404-406).

**References.**

- 1) Wang, Z.; Wang, Y.; Yin, G.; Wu, A. X. *J. Chem. Crystallogr.* **2008**, 38, 591-594.
- 2) Liu, Q.; Wang, J.; Zhao, G. *J. Chem. Crystallogr.* **2012**, 42, 727-732.

### Details of the refinements of 1 – 7

For **1**: In the refinement, the two chloroform solvent molecule (C43-Cl1-Cl2-Cl3 and C44-Cl4-Cl5-Cl6) were found to be disordered over two sites. The commands DFIX and EADP were used in the refinement to restrain some distances (e.g. C43-Cl1=1.73(1) Å) and thermal factors. The final most satisfactory occupancies for the C43, C44-involved chloroform were 0.57:0.43 and 0.86:0.14 for the major and minor components, respectively.

For **4**: In the refinement, one of the ethoxy groups (C29-C30) was found to be disordered. The commands DFIX, and EADP were used in the refinement to restrain some distances (eg. C29-C30=1.51(1) Å and C29-O4=1.45(1) Å) and thermal factors. The final most satisfactory occupancies for the C29-, C29'-involved ethoxy were 0.51:0.49 for the major and minor components.

For **5**: In the refinement, one of the ethoxy groups (C34-C35) was found to be disordered. The commands DFIX, and EADP were used in the refinement to restrain some distances (eg. C34-C35=1.51(1) Å and thermal factors. The final most satisfactory occupancies for the C34-, C34'-involved ethoxy were 0.50:0.50 for the major and minor components. One of three dichloromethane (C46) was disordered. The commands DFIX, and EADP were used in the refinement to restrain some distances (eg. C46-Cl5=1.73(1) Å and Cl5-Cl6=2.90(1) Å) and thermal factors. The final most satisfactory occupancies for the C46-, C46'-involved ethoxy were

0.46:0.54 for the major and minor components.

For **6**: In the refinement, one of the ethoxy groups (C13-C14) was found to be disordered. The command DFIX was used in the refinement to restrain some distances (eg. C13-C14=1.51(1) Å and C13-O6=1.51(1) Å) and thermal factors. The final most satisfactory occupancies for the C13-, C13'-involved ethoxy were 0.68:0.32 for the major and minor components.

For **7**: In the refinement, one of the ethoxy groups (C37-C38) was found to be disordered. The command DFIX was used in the refinement to restrain some distances (eg. C37-C38=1.48 Å and C37-O6=1.38 Å) and thermal factors. The final most satisfactory occupancies for the C13-, C13'-involved ethoxy were 0.67:0.33 for the major and minor components. One chloroform solvent molecule (C49-C11-C12-C13) was found to be disordered over two sites. The command DFIX was used in the refinement to restrain some distances (eg. C43-C11=1.73 Å) and thermal factors. The final most satisfactory occupancies for the C49, C49'-involved chloroform were 0.87: 0.13 for the major and minor components. The naphthalene ring (C17-C26) was found to be disordered. The command DFIX was used in the refinement to restrain some distances (eg. C19- C24=2.42 Å and C19-C23=1.39 Å) and thermal factors. The final most satisfactory occupancies for the C19-, C19'-involved ethoxy were 0.80:0.20 for the major and minor components.

**Table S1.** Crystallographic Data and Structure Refinement Details for **1–7**.

| empirical formula                          | <b>1</b>                                                              | <b>2</b>                                                                                          | <b>3</b>                                                               | <b>4</b>                                                              | <b>5</b>                                                                                           | <b>6</b>                                                                                | <b>7</b>                                                                      |
|--------------------------------------------|-----------------------------------------------------------------------|---------------------------------------------------------------------------------------------------|------------------------------------------------------------------------|-----------------------------------------------------------------------|----------------------------------------------------------------------------------------------------|-----------------------------------------------------------------------------------------|-------------------------------------------------------------------------------|
| CCDC deposition number                     | 992389                                                                | 992390                                                                                            | 992391                                                                 | 992392                                                                | 992393                                                                                             | 992394                                                                                  | 996879                                                                        |
| formula                                    | C <sub>44</sub> H <sub>42</sub> N <sub>6</sub> O <sub>8</sub> Cl<br>6 | C <sub>45</sub> H <sub>33</sub> N <sub>4</sub> O <sub>8</sub> F <sub>10</sub> C<br>I <sub>3</sub> | C <sub>46</sub> H <sub>46</sub> Cl <sub>6</sub> N <sub>6</sub> O<br>10 | C <sub>45</sub> H <sub>39</sub> N <sub>4</sub> O <sub>8</sub> Cl<br>3 | C <sub>47</sub> H <sub>41</sub> F <sub>2</sub> N <sub>3</sub> O <sub>8.5</sub> C<br>I <sub>3</sub> | C <sub>53.5</sub> H <sub>43.5</sub> N <sub>4</sub> O <sub>8</sub> C<br>I <sub>4.5</sub> | C <sub>49</sub> H <sub>43</sub> N <sub>4</sub> O <sub>8</sub> Cl <sub>3</sub> |
| formula weight                             | 995.54                                                                | 1054.10                                                                                           | 1055.59                                                                | 870.15                                                                | 928.18                                                                                             | 1029.95                                                                                 | 922.22                                                                        |
| crystal system                             | Triclinic                                                             | Triclinic                                                                                         | Triclinic                                                              | Monoclinic                                                            | Triclinic                                                                                          | Triclinic                                                                               | Triclinic                                                                     |
| space group                                | P-1                                                                   | P-1                                                                                               | P-1                                                                    | P2(1)/n                                                               | P-1                                                                                                | P-1                                                                                     | P-1                                                                           |
| a (Å)                                      | 10.7259(9)                                                            | 10.8333(15)                                                                                       | 11.0037(13)                                                            | 11.1774(14)                                                           | 12.9379(12)                                                                                        | 13.1674(15)                                                                             | 10.9368(13)                                                                   |
| b (Å)                                      | 14.2208(12)                                                           | 14.2199(19)                                                                                       | 13.2032(14)                                                            | 13.9112(18)                                                           | 13.0294(12)                                                                                        | 13.8587(16)                                                                             | 14.8456(18)                                                                   |
| c (Å)                                      | 14.8907(12)                                                           | 15.066(2)                                                                                         | 17.428(3)                                                              | 26.663(3)                                                             | 15.7092(14)                                                                                        | 13.8587(16)                                                                             | 15.7583(19)                                                                   |
| $\alpha$ (deg)                             | 92.5080(10)                                                           | 93.122(2)                                                                                         | 89.128(2)                                                              | 90.00                                                                 | 114.0830(10)                                                                                       | 64.005(2)                                                                               | 71.070(2)                                                                     |
| $\beta$ (deg)                              | 93.7200(10)                                                           | 108.057(2)                                                                                        | 76.376(2)                                                              | 97.601(2)                                                             | 111.3440(10)                                                                                       | 85.984(2)                                                                               | 89.029(2)                                                                     |
| $\gamma$ (deg)                             | 98.8250(10)                                                           | 99.045(2)                                                                                         | 72.207(11)                                                             | 90.00                                                                 | 76.410(2)                                                                                          | 67.813(2)                                                                               | 69.365(2)                                                                     |
| Z                                          | 2                                                                     | 2                                                                                                 | 2                                                                      | 4                                                                     | 2                                                                                                  | 2                                                                                       | 2                                                                             |
| V(Å <sup>3</sup> )                         | 2236.3(3)                                                             | 2166.0(5)                                                                                         | 2338.6(5)                                                              | 4109.4(9)                                                             | 2182.1(3)                                                                                          | 2363.3(5)                                                                               | 2251.2(5)                                                                     |
| Dcalcd(g cm <sup>-3</sup> )                | 1.478                                                                 | 1.616                                                                                             | 1.499                                                                  | 1.406                                                                 | 1.413                                                                                              | 1.447                                                                                   | 1.361                                                                         |
| $\mu$ (Mo K $\alpha$ ) (mm <sup>-1</sup> ) | 0.445                                                                 | 0.316                                                                                             | 0.433                                                                  | 0.284                                                                 | 0.278                                                                                              | 0.341                                                                                   | 0.263                                                                         |
| F(000)                                     | 1028                                                                  | 1072                                                                                              | 1092                                                                   | 1808                                                                  | 962                                                                                                | 1066                                                                                    | 960                                                                           |
| temp (K)                                   | 100(2)                                                                | 100(2)                                                                                            | 100(2)                                                                 | 220(2)                                                                | 100(2)                                                                                             | 100(2)                                                                                  | 296(2)                                                                        |
| $\theta$ min–max (deg)                     | 2.22, 20.81                                                           | 1.43, 25.50                                                                                       | 1.96, 25.01                                                            | 1.54, 16.19                                                           | 1.74, 22.69                                                                                        | 1.46, 23.09                                                                             | 1.37, 23.89                                                                   |
| tot., unique data                          | 13370, 4582                                                           | 15848, 7961                                                                                       | 14575, 8145                                                            | 9219, 2050                                                            | 12070, 5719                                                                                        | 13815, 6542                                                                             | 14305, 6825                                                                   |
| R(int)                                     | 0.0315                                                                | 0.0331                                                                                            | 0.1022                                                                 | 0.0373                                                                | 0.0251                                                                                             | 0.0626                                                                                  | 0.0335                                                                        |
| obsd data [ $I > 2\sigma(I)$ ]             | 3740                                                                  | 5667                                                                                              | 6350                                                                   | 1700                                                                  | 4676                                                                                               | 5135                                                                                    | 3976                                                                          |
| Nref, Npar                                 | 4582, 643                                                             | 7961, 636                                                                                         | 8145, 619                                                              | 2050, 553                                                             | 5719, 631                                                                                          | 6542, 691                                                                               | 6825, 723                                                                     |
| R1,wR2 (all data)                          | 0.0782,<br>0.1951                                                     | 0.0876, 0.1893                                                                                    | 0.1276,<br>0.2575                                                      | 0.0489,<br>0.1040                                                     | 0.0671, 0.1746                                                                                     | 0.0965, 0.2403                                                                          | 0.1059, 0.1818                                                                |
| S                                          | 1.080                                                                 | 1.157                                                                                             | 1.135                                                                  | 1.077                                                                 | 1.051                                                                                              | 1.042                                                                                   | 1.033                                                                         |
| min and max resd dens (e Å <sup>-3</sup> ) | -0.727, 0.882                                                         | -0.595, 0.824                                                                                     | -1.183, 1.700                                                          | -0.204, 0.308                                                         | -0.530, 0.642                                                                                      | -0.948, 0.962                                                                           | -0.333, 0.362                                                                 |

**Table S2.** C-H $\cdots\pi$  interactions in the packing of **1** and **2**

| C-H $\cdots\pi$ Interactions |                                                   |                  |                             |                  |
|------------------------------|---------------------------------------------------|------------------|-----------------------------|------------------|
|                              | C-H $\rightarrow$ R(j)                            | H $\cdots$ R (Å) | $\angle$ C-H $\cdots$ R (°) | C $\cdots$ R (Å) |
| <b>1</b> <sup>a</sup>        | C(33)-H(33B) $\rightarrow$ R(C35-40) <sup>□</sup> | 2.88             | 161                         | 3.833(5)         |
| <b>2</b> <sup>b</sup>        | C(36)-H(36A) $\rightarrow$ R(C37-42) <sup>□</sup> | 2.75             | 148                         | 3.632(3)         |

<sup>a</sup>Symmetry codes: (□) 2-X, 1-Y, 1-Z; <sup>b</sup>Symmetry codes: (i) 1-X, -Y, 1-Z.

<sup>1</sup>H and <sup>13</sup>C NMR Recorded for Compounds 1 – 7.

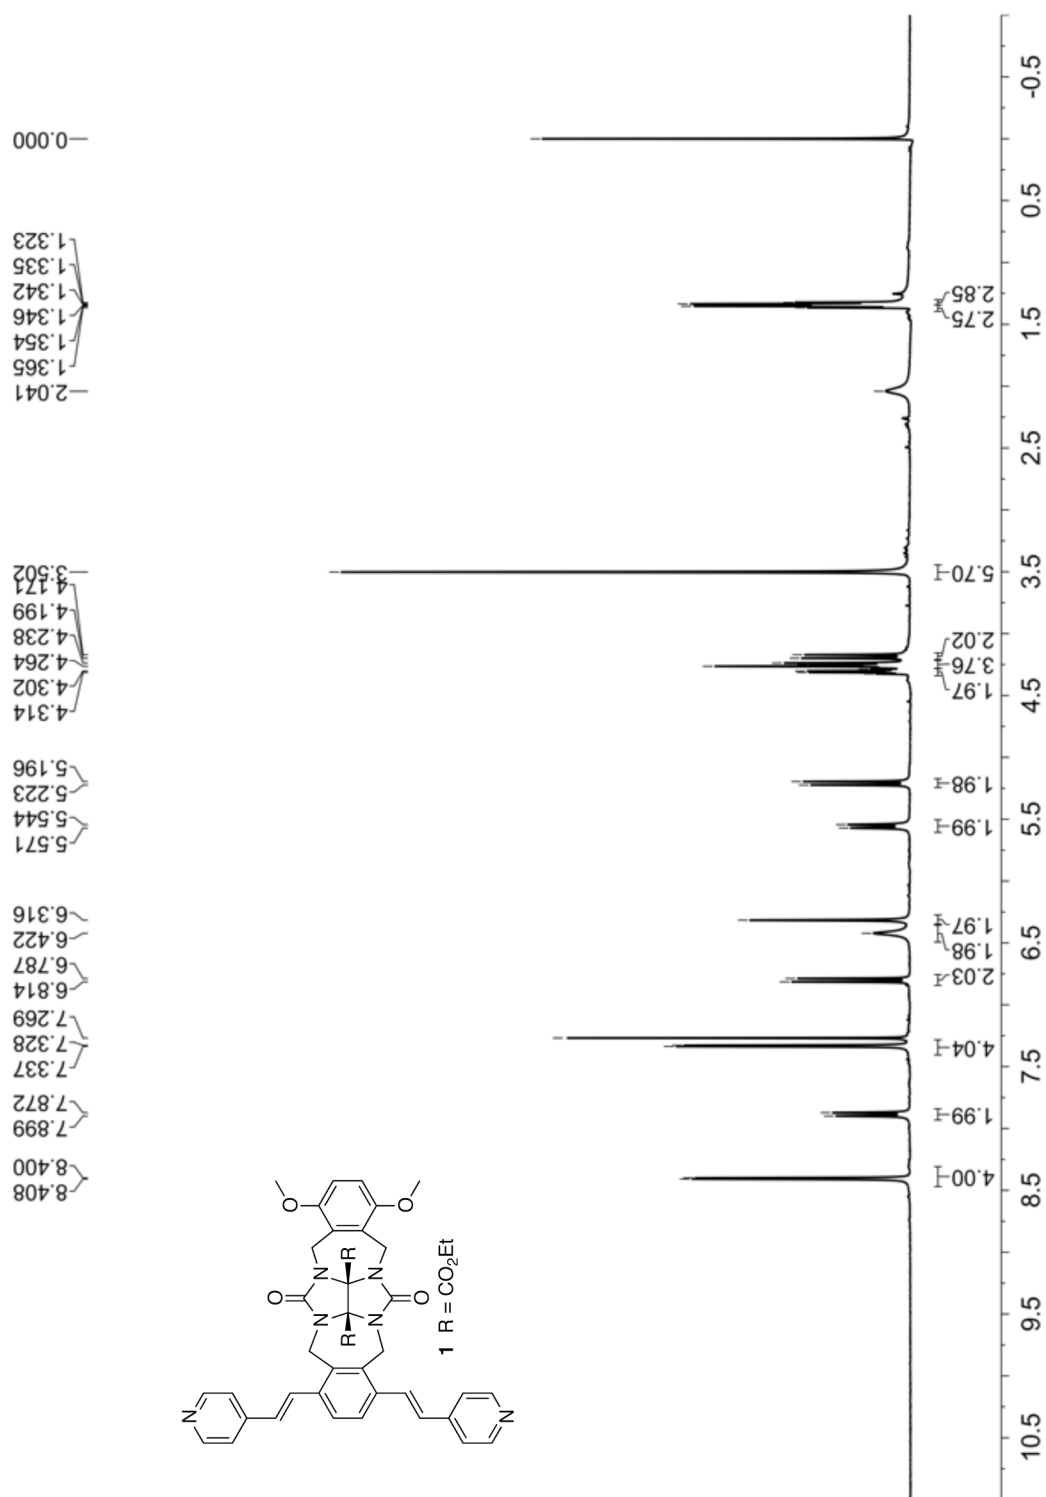

**Figure S1.** <sup>1</sup>H NMR spectrum recorded (600 MHz, CDCl<sub>3</sub>, RT) for compound 1.

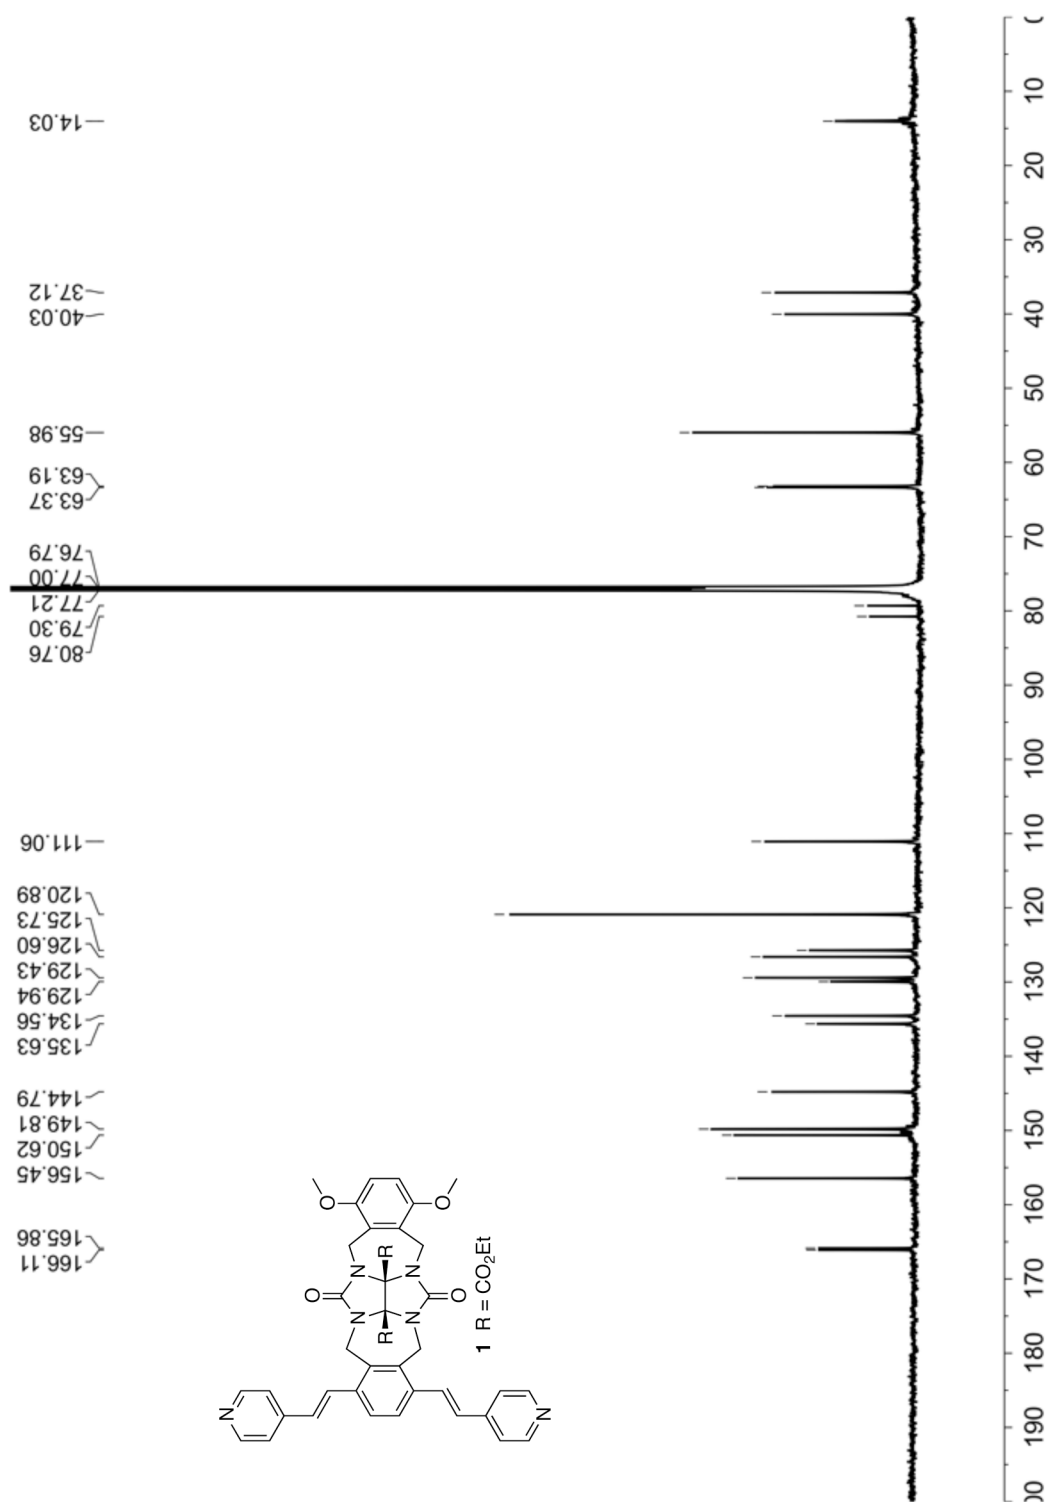

**Figure S2.**  $^{13}\text{C}$  NMR spectrum recorded (150 MHz,  $\text{CDCl}_3$ , RT) for compound **1**.





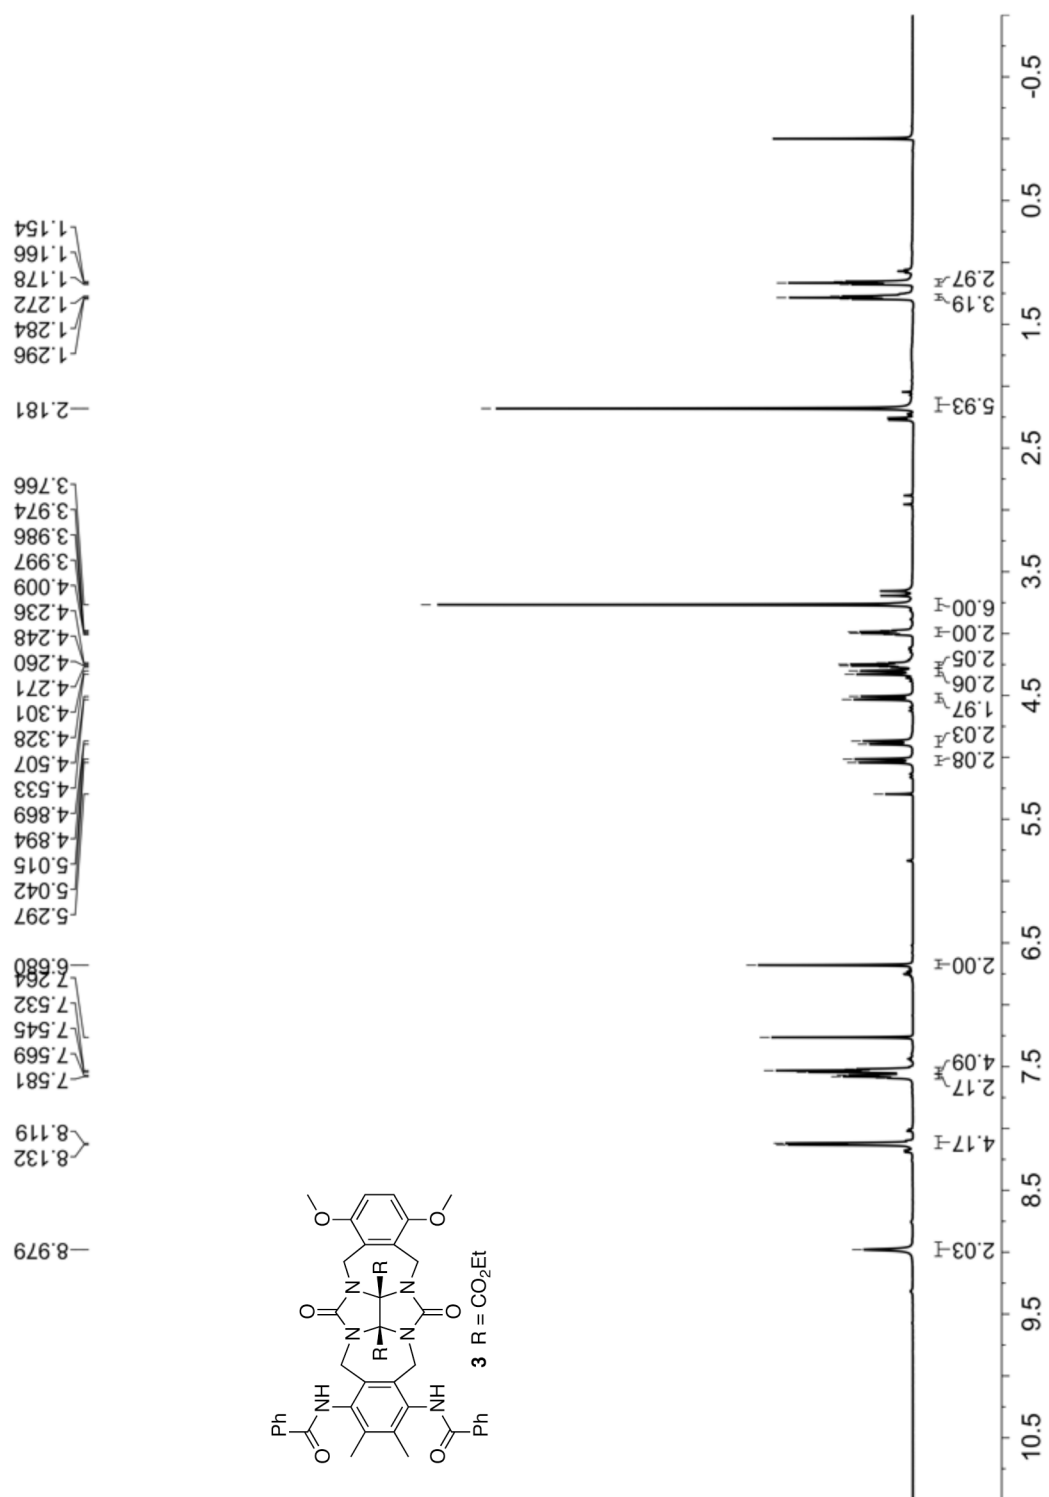

**Figure S5.**  $^1\text{H}$  NMR spectrum recorded (600 MHz,  $\text{CDCl}_3$ , RT) for compound **3**.

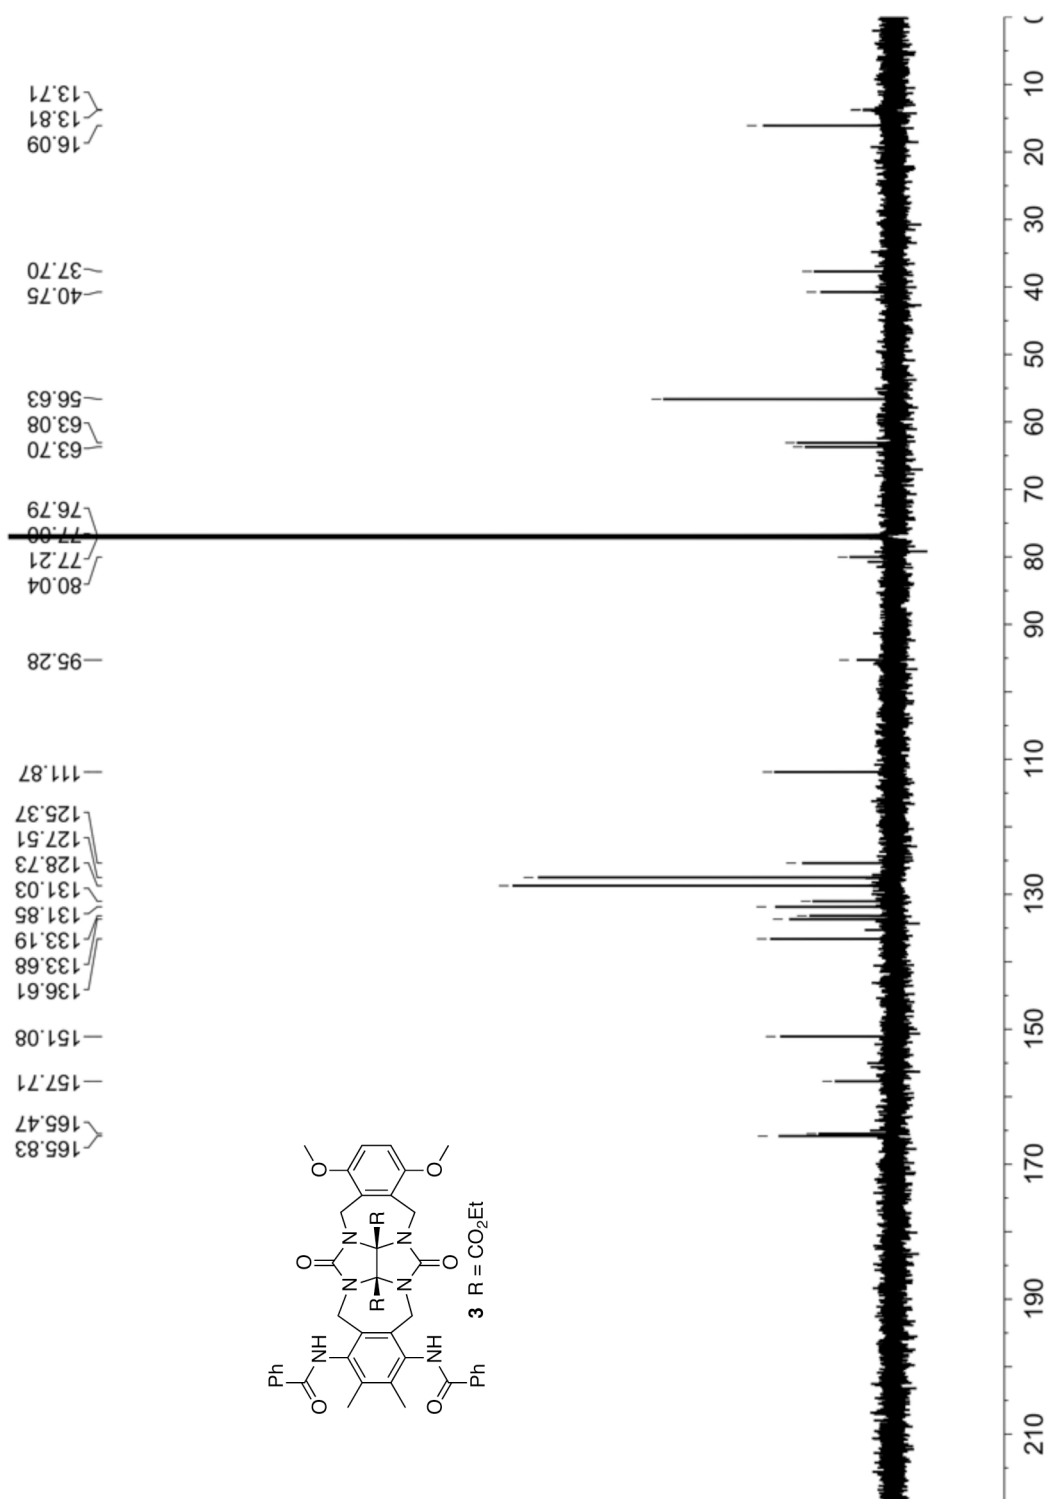

**Figure S6.** <sup>13</sup>C NMR spectrum recorded (150 MHz, CDCl<sub>3</sub>, RT) for compound **3**.





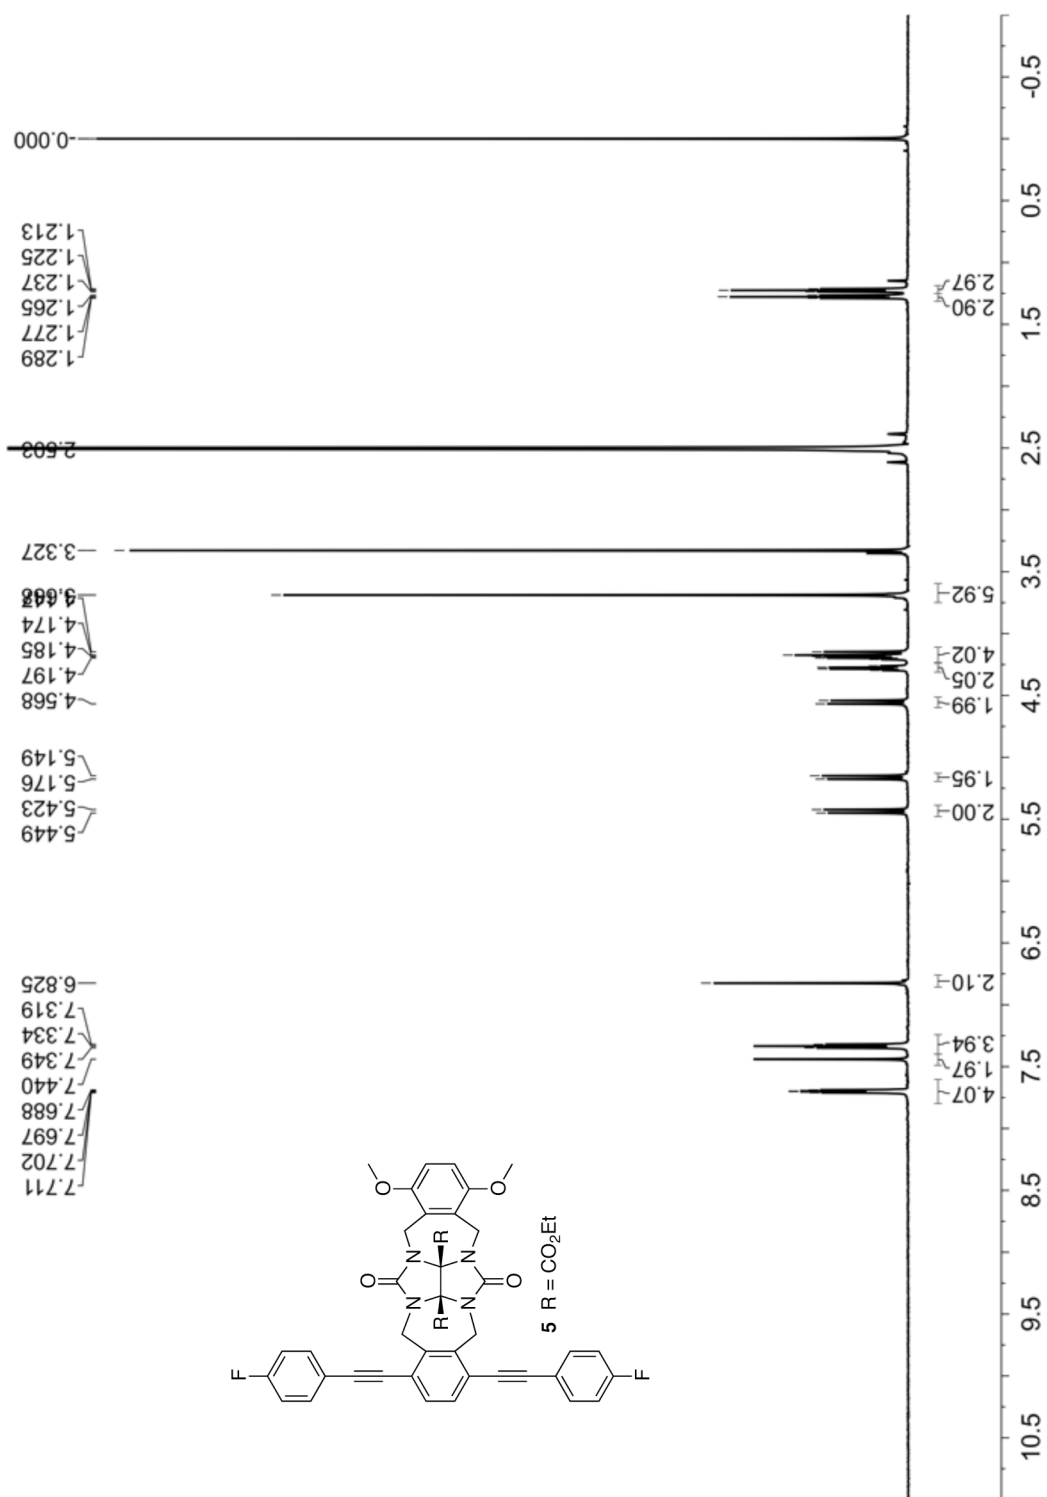

**Figure S9.**  $^1\text{H}$  NMR spectrum recorded (600 MHz, DMSO, RT) for compound **5**.

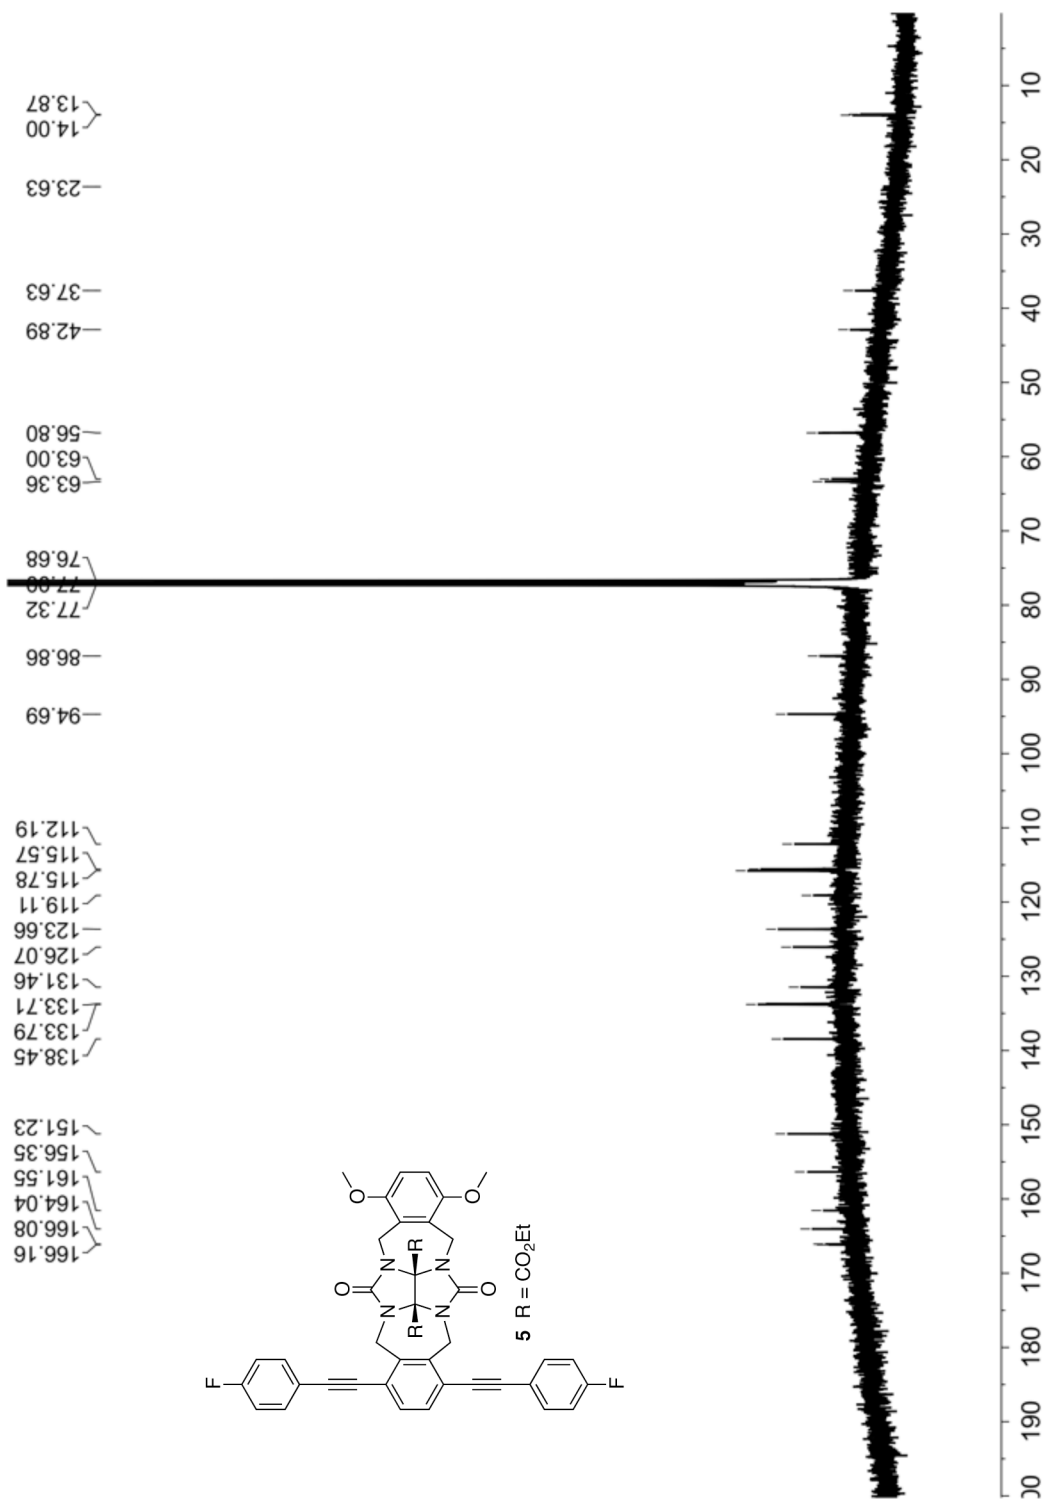

**Figure S10.** <sup>13</sup>C NMR spectrum recorded (150 MHz, CDCl<sub>3</sub>, RT) for compound **5**.

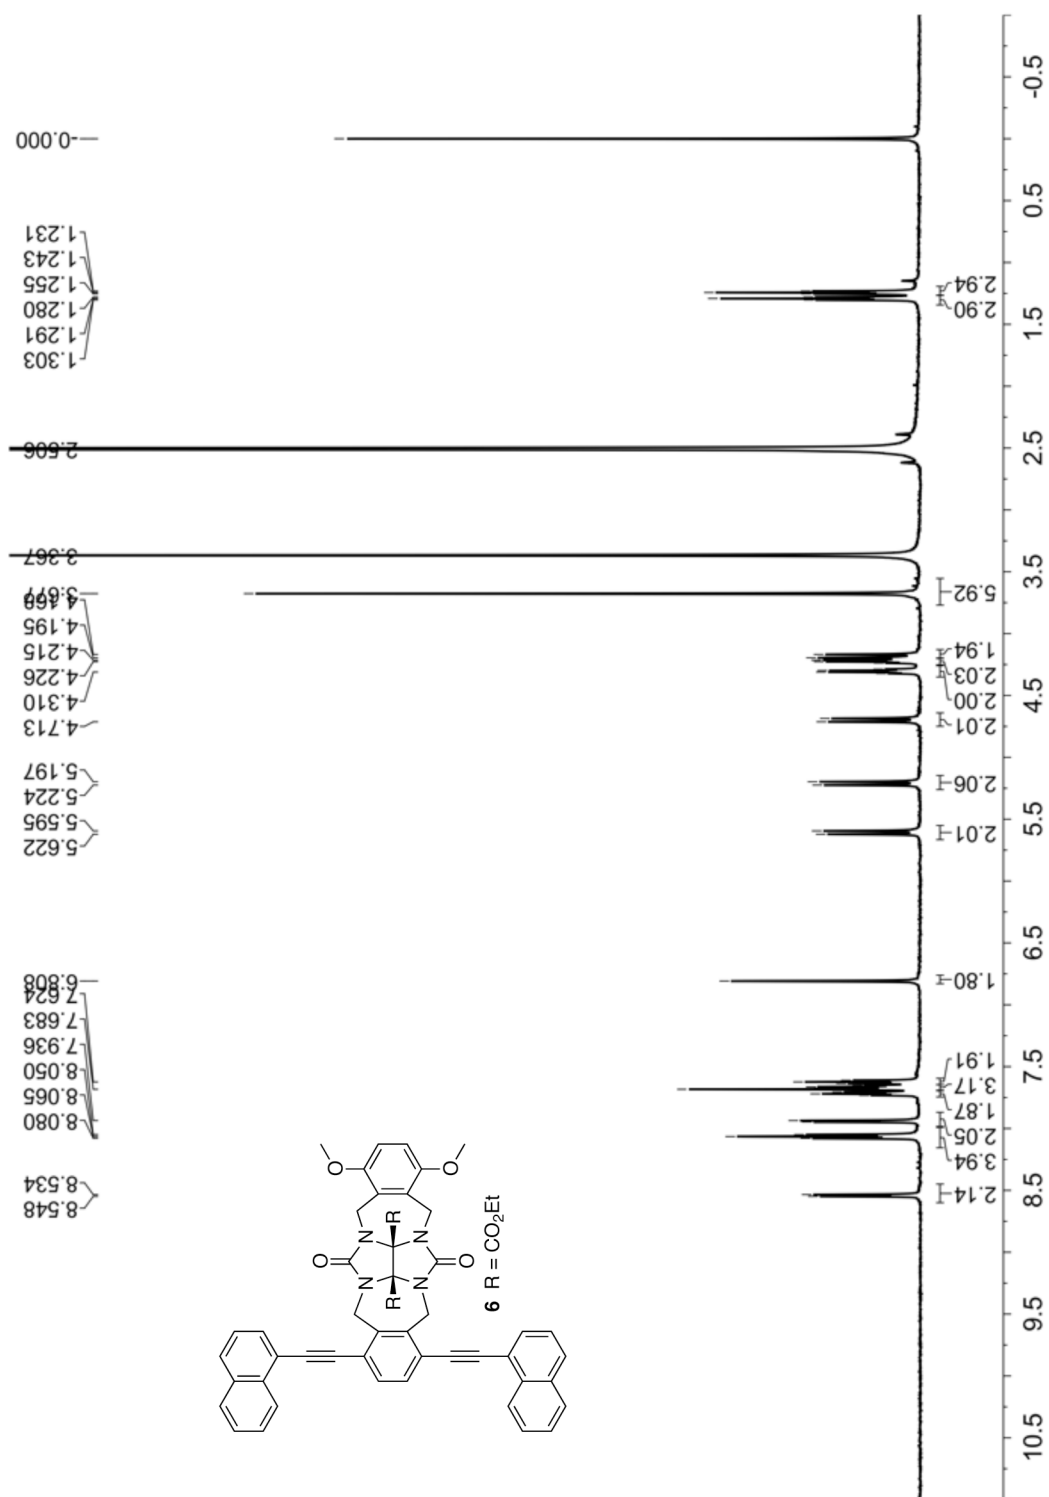

**Figure S11.**  $^1\text{H}$  NMR spectrum recorded (600 MHz, DMSO, RT) for compound **6**.



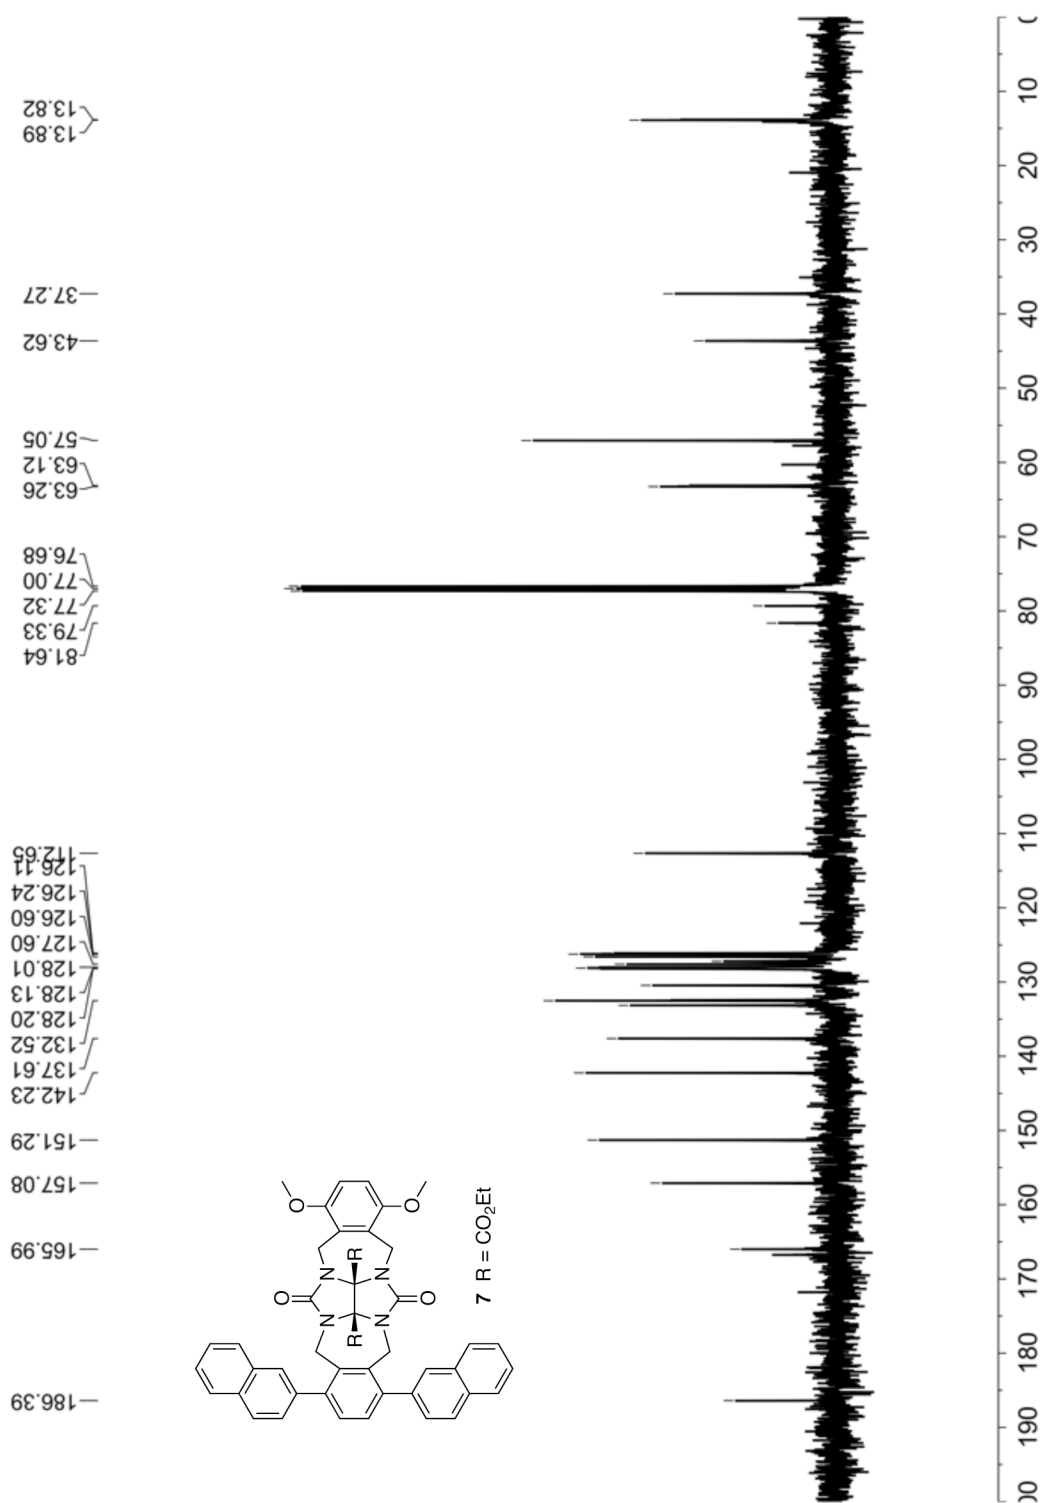

Supplement: c4ce02447h1.pdf [file c4ce02447h1.pdf]
